# Supplementary material for: Dealing with foreign cultural paradigms: A systematic review on intercultural challenges of international medical graduates
Source: PLOS journal article supplement (doi:10.1371/journal.pone.0181330), 2017-07-17
Supplement: S1 (10.1371/journal.pone.0181330.s001) [file journal.pone.0181330.s001]

Identification

6642 records identified  
in Web of Science

3046 records identified  
in OvidSP

6579 records after  
duplicates removed

3009 records after  
duplicates removed

9588 records in  
complete database

6632 records after  
duplicates removed

6632 records screened

6595 records excluded

37 full-text articles assessed  
for eligibility

7 full-text articles excluded

30 articles included  
in the review

Screening

Eligibility

Included
