# Supplementary material for: Dealing with foreign cultural paradigms: A systematic review on intercultural challenges of international medical graduates
Source: PLOS journal article supplement (doi:10.1371/journal.pone.0181330), 2017-07-17
Supplement: S2 (10.1371/journal.pone.0181330.s002) [file journal.pone.0181330.s002]

## **S1 Text**

### **Search strategy via Web of Science.**

1. oversea\* NEAR/3 (train\* OR qualified\*)
2. medic\* NEAR/3 immigr\*
3. (foreign\* OR international\*) NEAR/3 medical\* NEAR/3 graduate\*
4. (foreign\* OR international\*) NEAR/3 doctor\*
5. (foreign\* OR international\*) NEAR/3 physician\*
6. 1. OR 2. OR 3. OR 4. OR 5.
