# Supplementary material for: Dealing with foreign cultural paradigms: A systematic review on intercultural challenges of international medical graduates
Source: PLOS journal article supplement (doi:10.1371/journal.pone.0181330), 2017-07-17
Supplement: S3 (10.1371/journal.pone.0181330.s003) [file journal.pone.0181330.s003]

## S2 Text

### Inclusion criteria.

1. The observed population were physicians working as immigrants in an another country than their country of origin and training
2. The following topics were covered:
  - (a) Communication with
    - i. Patients and their families
    - ii. Other physicians
    - iii. Other health professionals
    - iv. Specific type of miscommunication
  - (b) Attitudes or expectations regarding issues that are important in treating patients or in health care system in general (death, illness, health, truth, delivering bad news etc. )
  - (c) Medical documentation and patient presentation
  - (d) Patient treatment
    - i. Duration
    - ii. Type, procedures, medication
  - (e) Health care system
    - i. Structure
    - ii. Economic factors
  - (f) Status of the physician
    - i. In society
    - ii. In the interdisciplinary team
    - iii. In the health care system
  - (g) Decision-making
    - i. Inclusion of the patient
    - ii. Inclusion of the family of the patient
    - iii. Compliance
  - (h) Team structure, capacity for teamwork and acceptance in the team
  - (i) Change of self-esteem
  - (j) Supervision or support for team inclusion
  - (k) Attitude to medical science and teaching
3. Empirical study (qualitative or quantitative)
4. Language: English or German
