# Supplementary material for: Dealing with foreign cultural paradigms: A systematic review on intercultural challenges of international medical graduates
Source: PLOS journal article supplement (doi:10.1371/journal.pone.0181330), 2017-07-17
Supplement: S6 (10.1371/journal.pone.0181330.s006) [file journal.pone.0181330.s006]

## S1 Table

### Category system of the qualitative studies.

| Main-category                                       | Sub-category                                             |
|-----------------------------------------------------|----------------------------------------------------------|
| A-1.1 Communication with patients                   | A-1.1.1 Way of treatment                                 |
|                                                     | A-1.1.2 Duration of treatment                            |
|                                                     | A-1.1.3 Patient information                              |
|                                                     | A-1.1.4 Medication                                       |
|                                                     | A-1.1.5 Hierarchy in the physician-patient relationship  |
|                                                     | A-1.1.6 Decision-making style                            |
|                                                     | A-1.1.7 Patient compliance                               |
|                                                     | A-1.1.8 Emotional support                                |
| A-1.2 Communication with relatives                  | A-1.2.1 Information of the patients family               |
|                                                     | A-1.2.2 Involvement of the relatives in decisions        |
|                                                     | A-1.2.3 Involvement of the relatives in treatment        |
|                                                     | A-1.2.4 Care of the patient                              |
| A-1.3 Communication with native physicians          | A-1.3.1 Presentation of the patient                      |
|                                                     | A-1.3.2 Hierarchy among physicians                       |
|                                                     | A-1.3.3 Supervisor support                               |
| A-1.4 Communication with other health professionals | A-1.4.1 Hierarchy in an interdisciplinary team           |
|                                                     | A-1.4.2 Allocation of tasks in an interdisciplinary team |
| A-1.5 Nonverbal communication                       |                                                          |
| A-1.6 Communication unspecified                     |                                                          |
| A-2.1 Health care system                            | A-2.1.1 Patient documentation                            |
|                                                     | A-2.1.2 Organizational structure                         |
|                                                     | A-2.1.3 Economic parameters                              |
|                                                     | A-2.1.4 Legal parameters                                 |
| A-3.1 Language                                      | A-3.1.1 Comprehension of language                        |
|                                                     | A-3.1.2 Use of language                                  |
|                                                     | A-3.1.3 Common speech                                    |
|                                                     | A-3.1.4 Medical terminology                              |
|                                                     | A-3.1.5 Accent or pronunciation                          |
|                                                     | A-3.1.6 Small talk or humor                              |
| A-4.1 Status of physicians                          | A-4.1.1 In society                                       |
|                                                     | A-4.1.2 In the health care system                        |
|                                                     | A-4.1.3 In an interdisciplinary team                     |
|                                                     | A-4.1.4 In the physician-patient relationship            |
| A-5.1 Origin of the IMGs                            | A-5.1.1 Cultural background                              |
|                                                     | A-5.1.2 Educational background                           |
| A-6.1 Immigration                                   | A-6.1.1 Cultural issues                                  |
|                                                     | A-6.1.2 Organizational issues                            |
|                                                     | A-6.1.3 Work-related issues                              |
| A-7.1 Racism or discrimination                      |                                                          |
| A-8.1 Gender issues                                 |                                                          |

### Category system of the qualitative studies including the main- and sub-categories.
