# Supplementary material for: Dealing with foreign cultural paradigms: A systematic review on intercultural challenges of international medical graduates
Source: PLOS journal article supplement (doi:10.1371/journal.pone.0181330), 2017-07-17
Supplement: S7 (10.1371/journal.pone.0181330.s007) [file journal.pone.0181330.s007]

## S2 Table

Category system based on the questions and instruments of the quantitative studies.

|                                      |                                    |
|--------------------------------------|------------------------------------|
| B-1.1 Context - work                 | B-1.1.1 Stress                     |
|                                      | B-1.1.2 Resources                  |
|                                      | B-1.1.3 Well-being                 |
| B-1.2 Context - colleagues/team      | B-1.2.1 Peers                      |
|                                      | B-1.2.2 Supervisors                |
|                                      | B-1.2.3 Other health professionals |
| B-1.3 Context - patients/relatives   |                                    |
| B-2.1 Communication among physicians | B-2.1.1 Individual communication   |
|                                      | B-2.1.2 Communication in a group   |
| B-3.1 Health care system             | B-3.1.1 Organizational structure   |
|                                      | B-3.1.2 Billing system             |
| B-4.1 Clinical skills                |                                    |

Category system based on the questions and instruments of the quantitative studies including the main- and sub-categories.
